# Supplementary material
Source: Royal Society of Chemistry journal article supplement (doi:10.1039/d6cp01043a)
Supplement: d6cp01043a2.pdf [file d6cp01043a2.pdf]

## Supplementary Information

# Structural evolution, superconductivity, and high carrier mobility in anti-perovskite $\text{Ca}_3\text{BiX}$ (X=H, N, P): First-principles calculations

Jingjing Chen<sup>a,b</sup>, Yangbo Li<sup>a,b</sup>, Miao Yu<sup>a,b</sup>, Zhengwei Tang<sup>a,b</sup>, Xiaoyu Kuang<sup>a,b</sup>  
and Aijie Mao<sup>\*a</sup>

<sup>a</sup>*College of Physics, Sichuan University, Chengdu 610065, China*

<sup>b</sup>*Institute of Atomic and Molecular Physics, Sichuan University, Chengdu 610065*

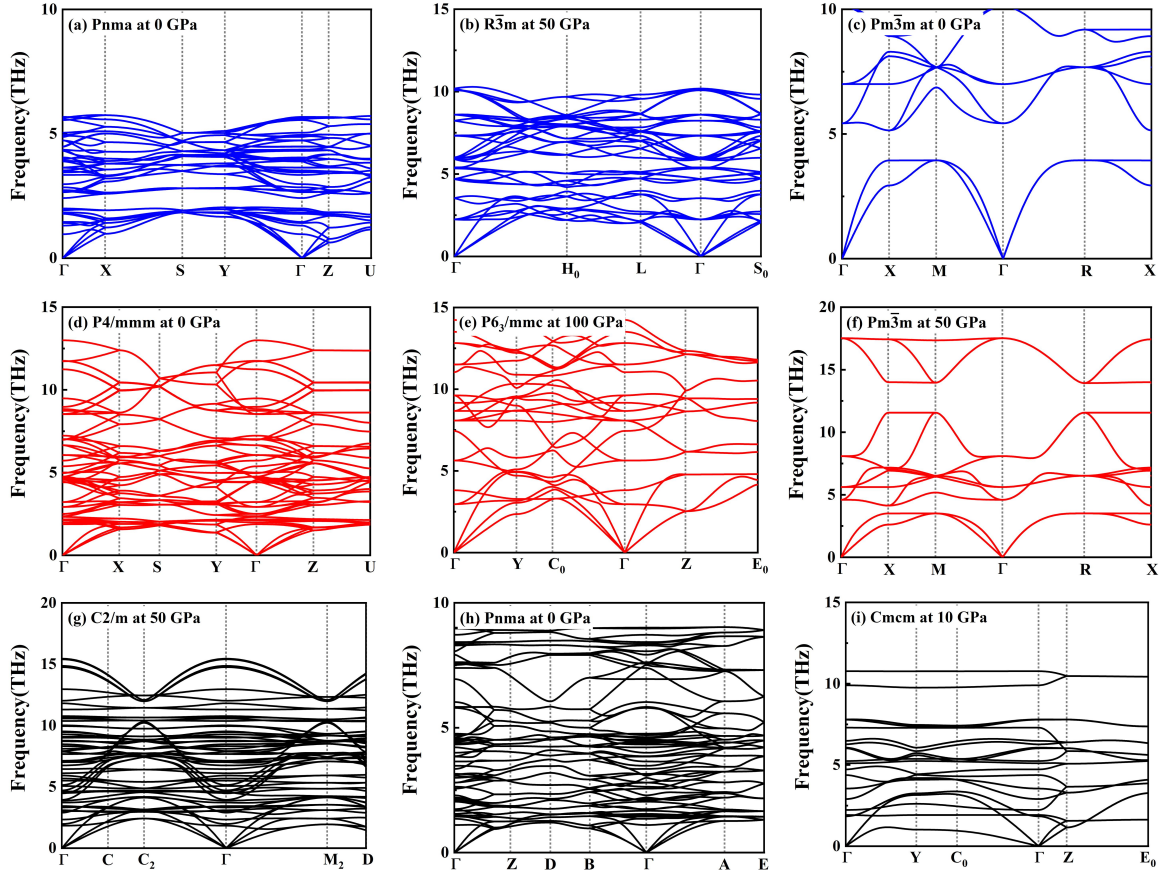

**Fig. S1** Phonon dispersion curves of  $\text{Ca}_3\text{BiH}$  in the (a) Pnma (0 GPa), (b)  $\text{P6}_3/\text{mmc}$  (50 GPa), and (c)  $\text{Pm}\bar{3}\text{m}$  (50 GPa);  $\text{Ca}_3\text{BiN}$  in the (d)  $\text{P4}/\text{mmm}$  (0 GPa), (e)  $\text{P6}_3/\text{mmc}$  (100 GPa), and (f)  $\text{Pm}\bar{3}\text{m}$  (50 GPa); and  $\text{Ca}_3\text{BiP}$  in the (g)  $\text{C2}/\text{m}$  (100 GPa), (h) Pnma (5 GPa), and (i) Cmcm (10 GPa).

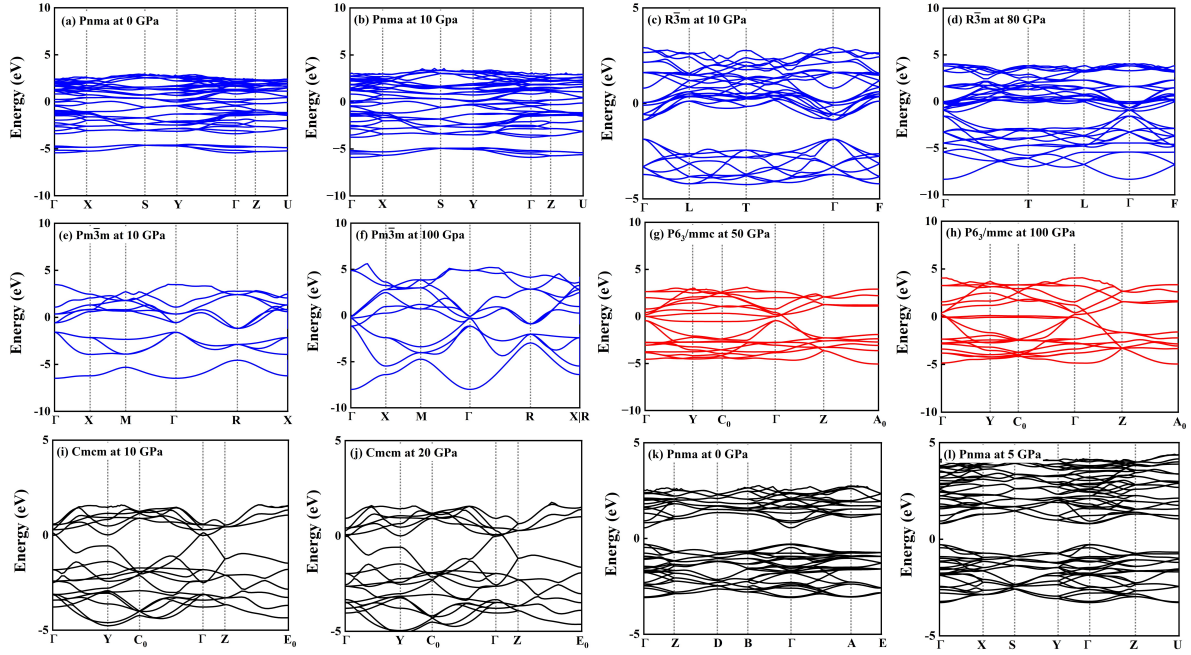

**Fig. S2** Band structures of  $\text{Ca}_3\text{BiH}$  of Pnma at (a) 0 GPa, (b) 10 GPa,  $\bar{R}3m$  at (c) 10 GPa, (d) 80GPa,  $\bar{P}m\bar{3}m$  at (e) 10 GPa, (f) 100 GPa,  $\text{Ca}_3\text{BiN}$  of  $P6_3/mmc$  at (g) 50 GPa, (h) 100 GPa, and  $\text{Ca}_3\text{BiP}$  of Cmc at (i) 10 GPa, (j) 20 GPa, Pnma at (k) 0 GPa, (l) 5GPa.

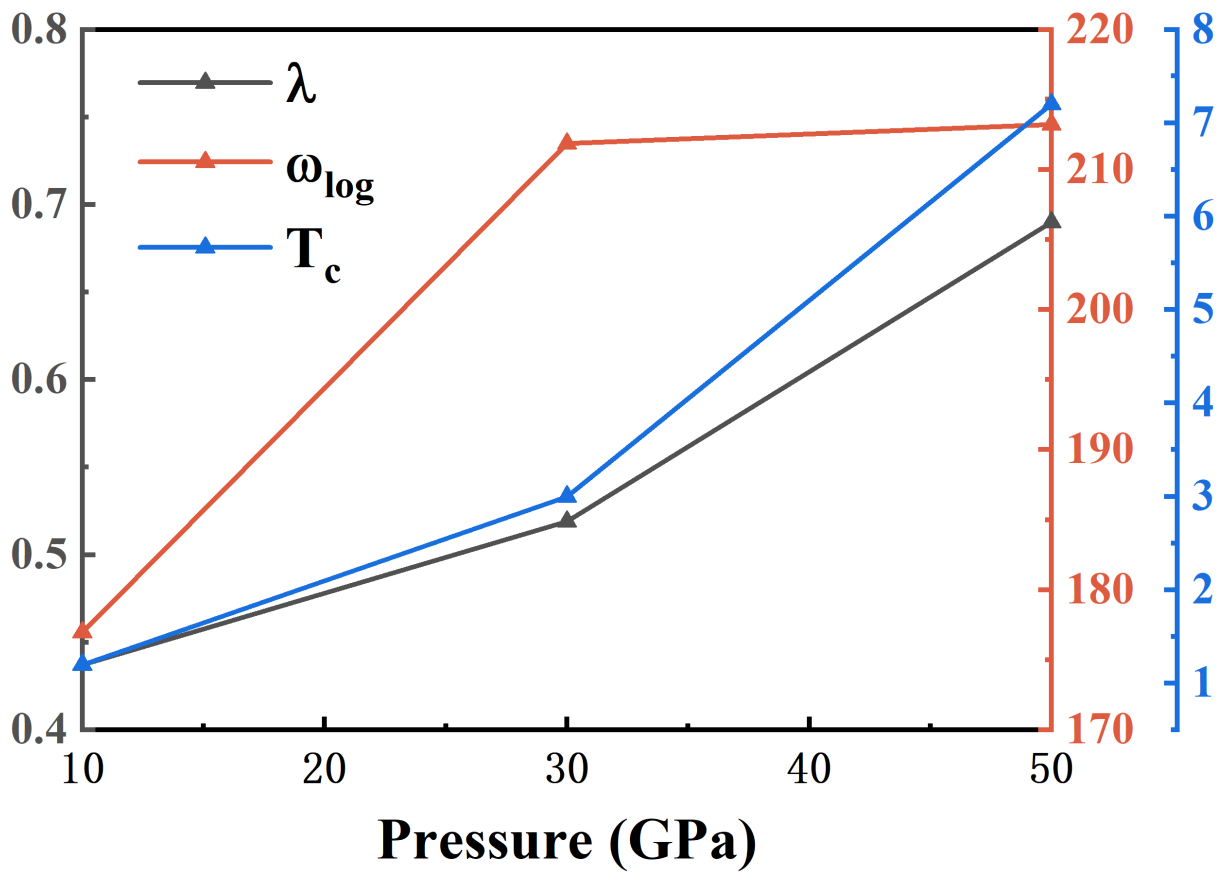

**Fig. S3** The  $\lambda$ ,  $\omega_{\log}$ , and  $T_c$  values for  $Pm\bar{3}m$  at 10, 30, and 50 GPa.

**Table S1** The band gap values corresponding to the stable phases of  $\text{Ca}_3\text{BiP}$  ( $X = \text{H, N, P}$ ) in Fig. 3 and Fig. S2.

| Anti-perovskite         | Space group         | Pressure (GPa) | Band gap value (eV) |
|-------------------------|---------------------|----------------|---------------------|
| $\text{Ca}_3\text{BiH}$ | $\text{Pnma}$       | 0              | Metal               |
|                         |                     | 10             | Metal               |
|                         | $R\bar{3}m$         | 10             | Metal               |
|                         |                     | 80             | Metal               |
|                         | $\text{Pm}\bar{3}m$ | 10             | Metal               |
|                         |                     | 100            | Metal               |
| $\text{Ca}_3\text{BiN}$ | $\text{P4}/mmm$     | 0              | 0.3528              |
|                         |                     | 70             | Metal               |
|                         | $\text{P6}_3/mmc$   | 50             | Metal               |
|                         |                     | 100            | Metal               |
|                         | $\text{Pm}\bar{3}m$ | 0              | 0.3731              |
|                         |                     | 70             | Metal               |
| $\text{Ca}_3\text{BiP}$ | $\text{C2}/m$       | 10             | 0.1316              |
|                         |                     | 100            | Metal               |
|                         | $\text{Pnma}$       | 0              | 0.8444              |
|                         |                     | 5              | 1.0799              |
|                         |                     | 10             | Metal               |
|                         |                     | 20             | Metal               |
| $\text{Cmcm}$           | 10                  | Metal          |                     |
|                         | 20                  | Metal          |                     |

**Table S2** The effective carrier mass  $m^*(m_0)$ , deformation potential  $E_a(\text{eV})$ , and carrier mobility  $\mu_a(\text{cm}^2 \cdot \text{V}^{-1} \cdot \text{s}^{-1})$  of electrons and holes in the Pnma phase of  $\text{Ca}_3\text{BiP}$  along the x, y, and z directions.

| Carrier    | $m_{xx}^*$ | $m_{yy}^*$ | $m_{zz}^*$ | $E_{xx}$ | $E_{yy}$ | $E_{zz}$ | $\mu_{xx}$ | $\mu_{yy}$ | $\mu_{zz}$ |
|------------|------------|------------|------------|----------|----------|----------|------------|------------|------------|
| Electronic | 0.101      | 0.133      | 0.144      | 3.36     | 10.81    | 6.63     | 71520.09   | 4617.19    | 9898.10    |
| Hole       | 0.652      | 0.106      | 1.022      | 2.25     | 10.06    | 3.73     | 1503.79    | 9397.67    | 233.12     |
